# Supplementary material for: Does diffusion-weighted Imaging (DWI) offer added value over Conventional Magnetic Resonance Imaging (MRI) in evaluating synovial Pathologies of the Knee? - A Prospective Observational Study of 63 patients
Source: Research Square preprint supplement (doi:10.21203/rs.3.rs-8309902/v1), 2026-01-30
Supplement: Supplementary file 1 [file bbda89c6cbf26c1bef6a8ceb.docx]

**Table 5: Presence of Diffusion Restriction Among Patients**

| **Sr no.** | **Diffusion Restriction** (Present/Absent) | **No of participants** | **(Percentage)** |
| --- | --- | --- | --- |
| **1** | Present | 51 | 81% |
| **2** | Absent | 12 | 19% |
|  | **Total** | 63 | 100% |

**Table 6: Kappa Statistic for Measure of Agreement with Asymptotic Standard Error and Significance**

| **Symmetric Measures** | | | | | |
| --- | --- | --- | --- | --- | --- |
|  | | Value | Asymptotic Standard Error | Approximate Tb | Approximate Significance |
| Measure of Agreement | Kappa | .836 | .063 | 12.424 | .000 |
| No Valid Cases | | 63 |  |  |  |
| a. Not assuming the null hypothesis. | | | | | |
| b. Using the asymptotic standard error assuming the null hypothesis. | | | | | |

**Table 7: Independent-samples Kruskal-Wallis test for ADC values across different synovial pathologies**

| **Independent-Samples Kruskal-Wallis Test Summary** | |
| --- | --- |
| Total N | 63 |
| Test Statistic | 28.383a |
| Degree of Freedom | 6 |
| Asymptotic Sig. (2-sided test) | .000 |
| a. The test statistic is adjusted for ties. | |
